# Supplementary material
Source: ML conference proceedings conference paper supplement (https://aclanthology.org/2022.findings-emnlp.110)
Supplement: note [file 2022.findings-emnlp.110.note.pdf]

## Changes

Although our paper is Accept-to-Findings, not Conditional-Accept-to-Findings, we upload a list of updated content due to the large amount of content.

- Added Abstract Meaning Representation (AMR) parser usage.
- Added Difference Graph definition.
- Changed the values of precision and recall in Table 3 and 4 from medium to hard.
- Changed qualitative results (including Fig.5) from a medium case to a hard case.
- Added citations to ALFWorld and ScienceWorld to Limitation.
- Modified terminology (“graph” to “triple of graph instead”).
- Add a subsection for common sense literature to the related work section.
- We have removed it from the supplementary material because we plan to upload the source code to GitHub by the day of the conference.
